# Supplementary material for: Identifying the grade of bladder cancer cells using microfluidic chips based on impedance
Source: Royal Society of Chemistry journal article supplement (doi:10.1039/d2an00026a), 2022-01-01
Supplement: d2an00026a1.pdf [file d2an00026a1.pdf]

# Identifying the Grade of Bladder Cancer Cells by Microfluidic chip based-on impedance

Weihua Fan<sup>a,b,d</sup>, Qiao Xiong<sup>c</sup>, Yuqing Ge<sup>a,\*</sup>, Ting liu<sup>a</sup>, Shuxiong Zeng<sup>c,\*\*</sup> and Jianlong Zhao<sup>a,d,\*\*\*</sup>

<sup>a</sup> State Key Laboratory of Transducer Technology, Shanghai Institute of Microsystem and Information Technology, Chinese Academy of Sciences, Shanghai 200050, Shanghai, China

<sup>b</sup> Guangzhou Institute of Biomedicine and Health, Chinese Academy of Sciences, Guangzhou 510530, Guangzhou, China

<sup>c</sup> Department of Urology, Changhai Hospital, Naval Medical University, 200433, Shanghai, P. R. China

<sup>d</sup> Center of Materials Science and Optoelectronics Engineering, University of Chinese Academy of Sciences, Beijing 100049, Beijing, China

The clinical and pathological information of six patients were shown in **Table S1**:

**Table S1.** Clinical and pathological features of patients for impedance spectroscopy analysis

| Patient | Age (years) | Gender | Surgery | Stage | Grade | bladder cancer history |
|---------|-------------|--------|---------|-------|-------|------------------------|
| 1       | 46          | Female | TURBT   | Ta    | Low   | Primary                |
| 2       | 80          | Male   | TURBT   | T1    | High  | Recurrence             |
| 3       | 73          | Male   | TURBT   | Ta    | Low   | Recurrence             |
| 4       | 80          | Male   | TURBT   | T1    | High  | Primary                |
| 5       | 57          | Male   | TURBT   | Ta    | High  | Primary                |
| 6       | 66          | Male   | TURBT   | Ta    | Low   | Primary                |

TURBT=transurethral resection of bladder tumor

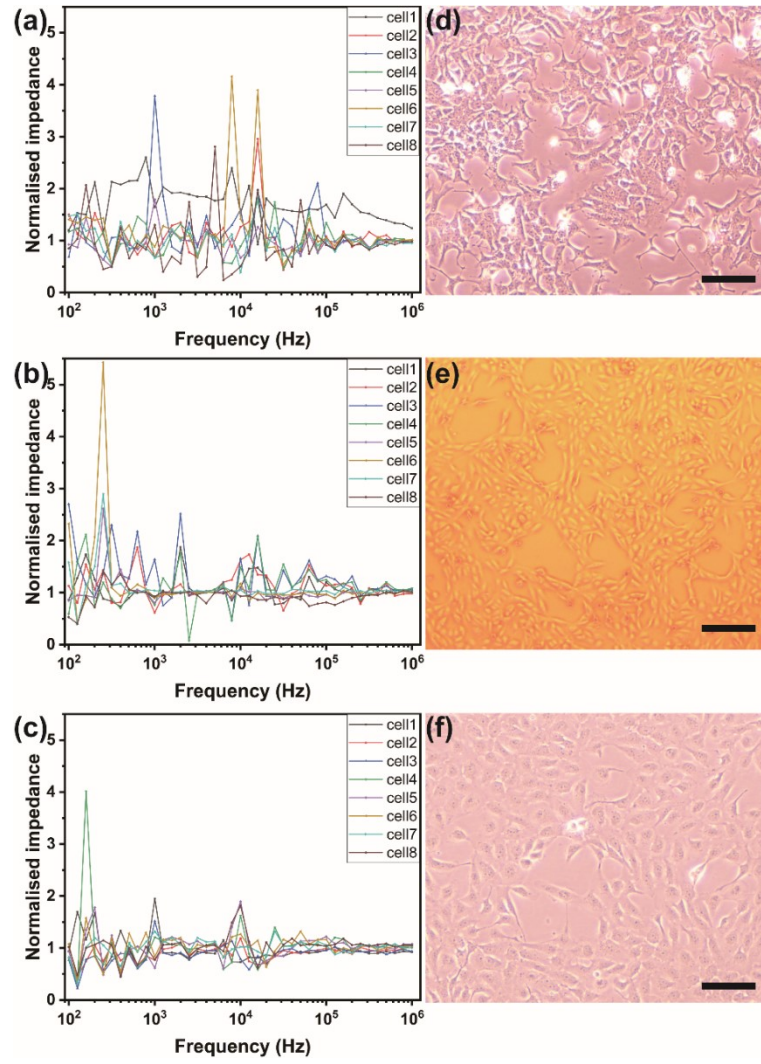

**Figure S1.** Cell impedance spectrum of (a) SV-HUC, (b) BIU-87, (c) 5637; and their corresponding morphology of (d) SV-HUC, (e) BIU-87, (f) 5637. The scale bars are 50  $\mu\text{m}$ .
